# Supplementary material for: Deprotonated carbohydrate anion fragmentation chemistry: structural evidence from tandem mass spectrometry, infra-red spectroscopy, and theory
Source: Royal Society of Chemistry journal article supplement (doi:10.1039/c8cp02620c), 2018-01-01
Supplement: c8cp02620c1.pdf [file c8cp02620c1.pdf]

# **Deprotonated Carbohydrate Anion Fragmentation Chemistry: Structural Evidence from Tandem Mass Spectrometry, Infra-Red Spectroscopy, and Theory**

Jordan M. Rabus<sup>1</sup>, Daniel R. Simmons<sup>1</sup>, Philippe Maître<sup>2</sup>, Benjamin J. Bythell<sup>1\*</sup>

<sup>1</sup>Department of Chemistry and Biochemistry, University of Missouri, St. Louis,  
MO 63121, USA.

<sup>2</sup>Laboratoire de Chimie Physique (UMR8000), CNRS, Univ. Paris-Sud, Université  
Paris-Saclay, 91405, Orsay, France.

Manuscript: CP-ART-04-2018-002620.R1

Submission: 3 October 2018

\*Address for correspondence:

Dr. Benjamin J. Bythell, Department of Chemistry and Biochemistry, University of Missouri-St.  
Louis, St. Louis, MO 63121. Email: bythellb@umsl.edu

Key Words: Glycans, Mass spectrometry, Collision-induced Dissociation, Ion Structure, Density  
functional theory.

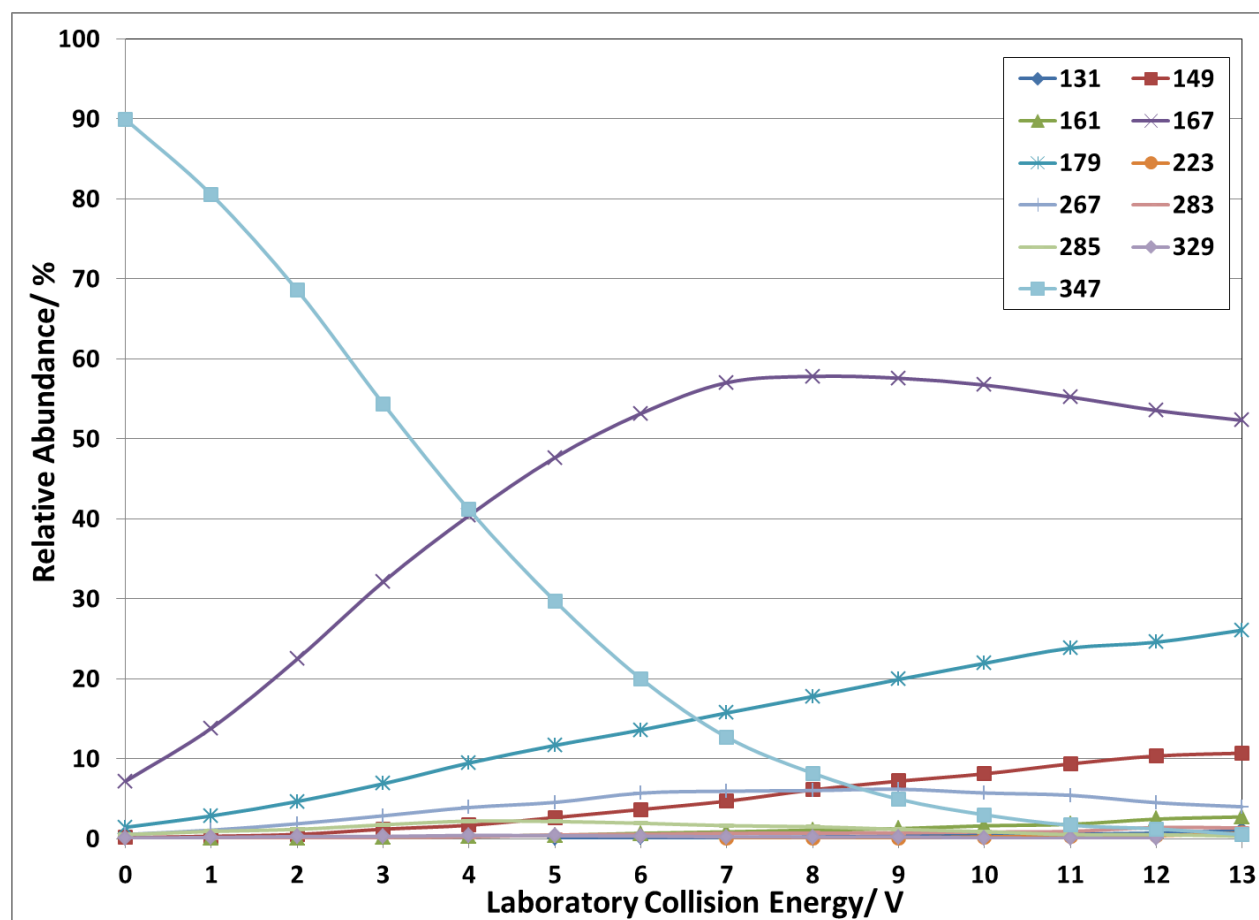

Figure S1: Energy-resolved tandem mass spectra of deprotonated lactose-(glucose- $^{13}\text{C}_6$ ). KEY:  $m/z$  347, [lactose-(glucose- $^{13}\text{C}_6$ )-H] $^-$ ;  $m/z$  167,  $Z_1$  ( $^{13}\text{C}_6\text{H}_9\text{O}_5^-$ );  $m/z$  179,  $C_1$  ( $\text{C}_6\text{H}_{11}\text{O}_6^-$ );  $m/z$  149,  $Z_1\text{-H}_2\text{O}$  ( $^{13}\text{C}_6\text{H}_7\text{O}_4^-$ );  $m/z$  161,  $B_1$  or  $C_1\text{-H}_2\text{O}$  ( $\text{C}_6\text{H}_9\text{O}_5^-$ );  $m/z$  285,  $^{0,2}A_2$  ( $^{13}\text{C}_4\text{C}_6\text{H}_{17}\text{O}_9^-$ );  $m/z$  267,  $^{0,2}A_2\text{-H}_2\text{O}$  ( $^{13}\text{C}_4\text{C}_6\text{H}_{15}\text{O}_8^-$ ).

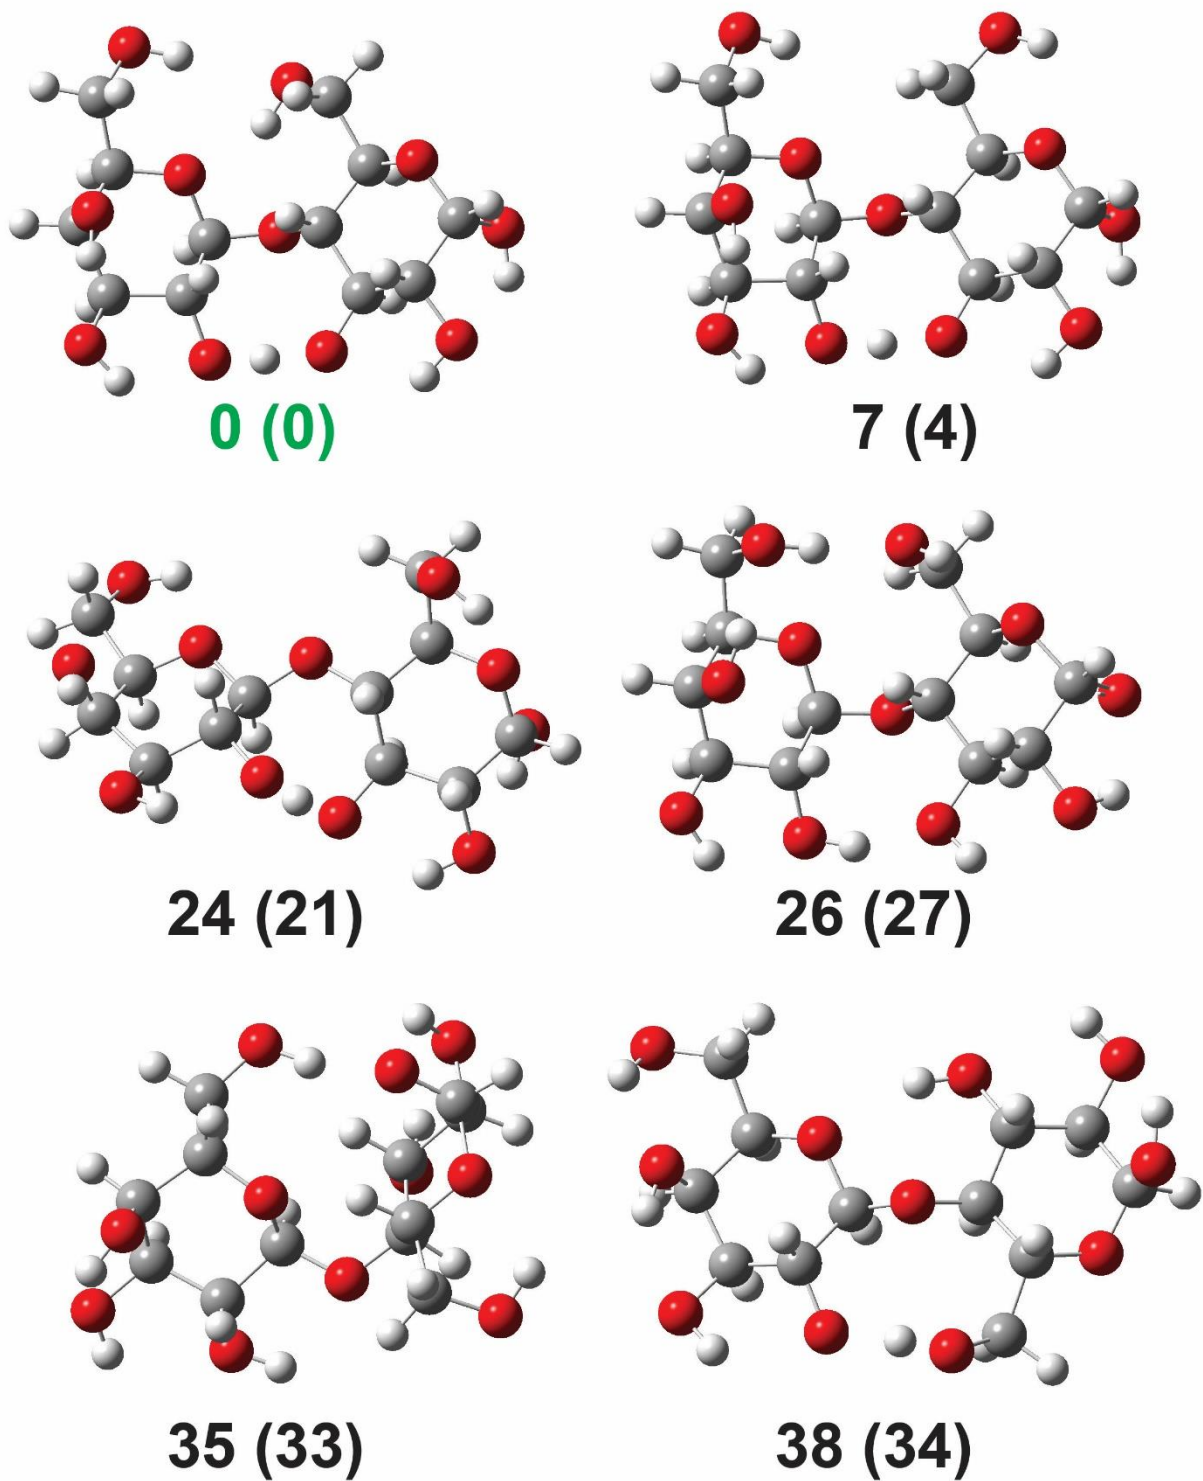

Figure S2: Relative energies of selected low-energy conformers of deprotonated lactose ( $\beta$ -D-galactopyranosyl-(1 $\rightarrow$ 4)- $\alpha$ -D-Glucose anomer) calculated at the M06-2X/6-31++G(d,p) level of theory. Values in kJ mol<sup>-1</sup>:  $\Delta E_{\text{el+ZPE,0K}}$  ( $\Delta G_{298}$ ).

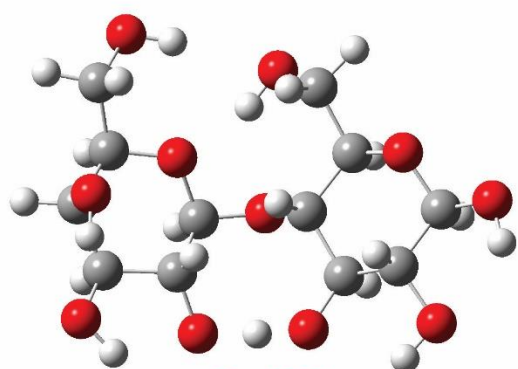

**0 (0)**

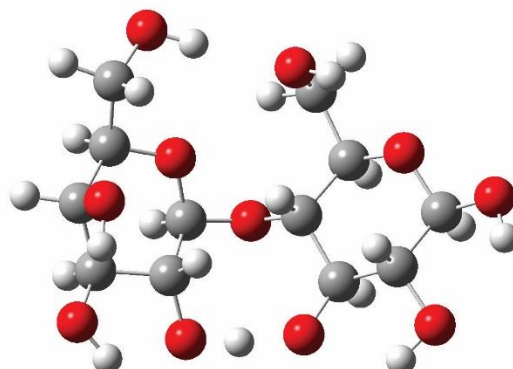

**12 (13)**

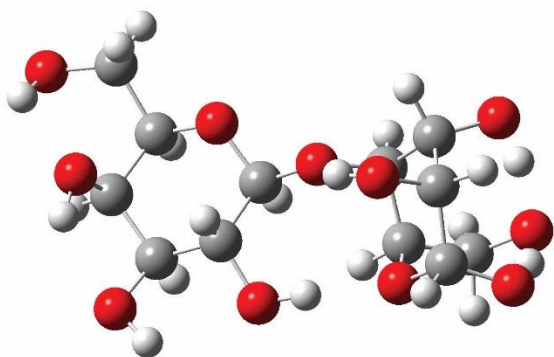

**19 (21)**

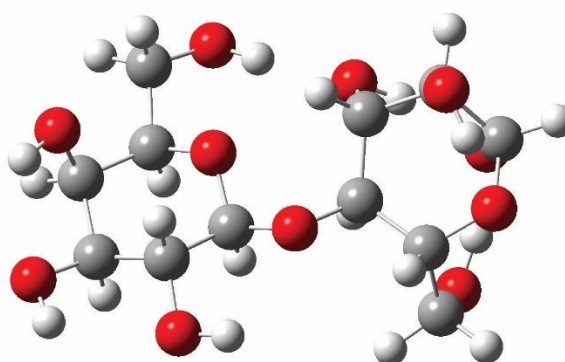

**25 (24)**

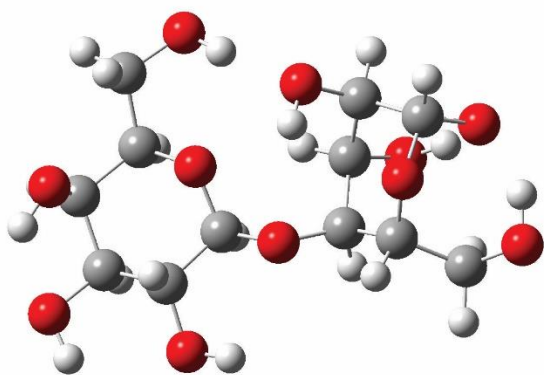

**38 (41)**

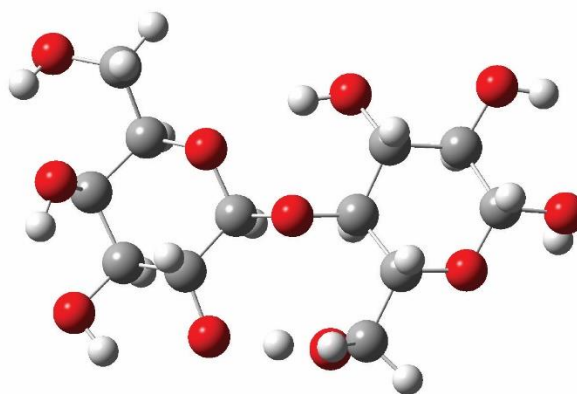

**40 (39)**

Figure S3: Relative energies of selected low-energy conformers of deprotonated lactose ( $\beta$ -D-galactopyranosyl-(1 $\rightarrow$ 4)- $\beta$ -D-Glucose anomer) calculated at the M06-2X/6-31++G(d,p) level of theory. Values in kJ mol<sup>-1</sup>:  $\Delta E_{\text{el+ZPE,0K}}$  ( $\Delta G_{298}$ ). The  $\beta$ -anomer GM is 5.0 (3.6) kJ mol<sup>-1</sup>,  $\Delta E_{\text{el+ZPE,0K}}$  ( $\Delta G_{298}$ ) above the  $\alpha$ -anomer (Table 1).

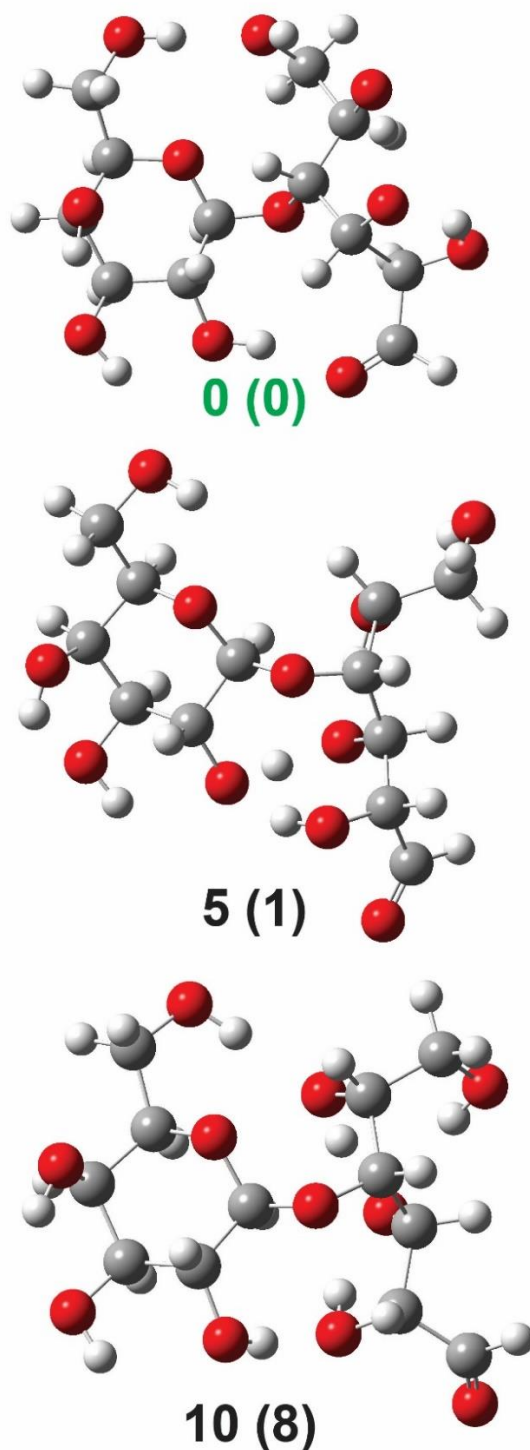

Figure S4: Relative energies of selected low-energy conformers of deprotonated lactose ( $\beta$ -D-galactopyranosyl-(1 $\rightarrow$ 4)- $\beta$ -D-Glucose ring-open) calculated at the M06-2X/6-31++G(d,p) level of theory. Values in  $\text{kJ mol}^{-1}$ :  $\Delta E_{\text{el+ZPE,0K}}$  ( $\Delta G_{298}$ ). The ring-open GM is 32.1 (28.1)  $\text{kJ mol}^{-1}$ ,  $\Delta E_{\text{el+ZPE,0K}}$  ( $\Delta G_{298}$ ) above the  $\alpha$ -anomer (Table 1) and 27.1 (24.5)  $\text{kJ mol}^{-1}$  above the  $\beta$ -anomer (Table 2).

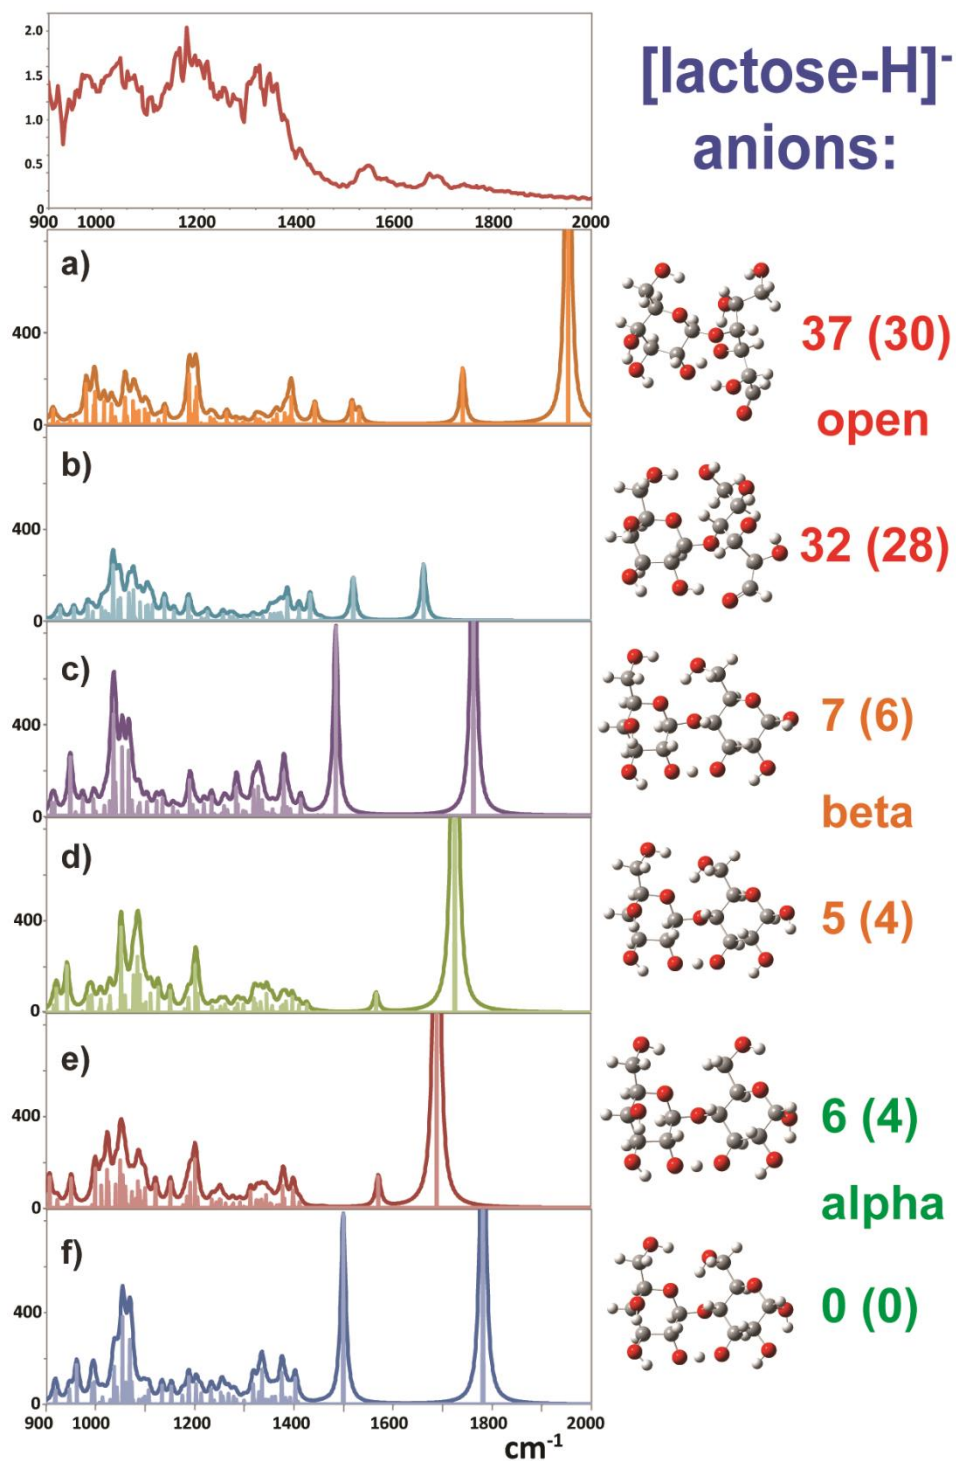

Figure S5: Comparison to the 2 lowest energy structures of deprotonated  $\beta$ -D-galactopyranosyl-(1 $\rightarrow$ 4)-D-glucose ( $m/z$  341.12 ( $C_{12}H_{21}O_{11}^-$ )) with frequencies calculated from B3LYP/6-311++G(2d,2p) optimized structures. Panels a and b are ring-open forms, panels c and d  $\beta$ -glucose anomers, while panels e and f are  $\alpha$ -glucose forms. Relative energies calculated at the M06-2X/6-31++G(d,p) level of theory. Values in kJ mol<sup>-1</sup>:  $\Delta E_{el+ZPE,0K}$  ( $\Delta G_{298}$ ) and are normalized to the  $\alpha$ -glucose forms. Structural changes between the 2 levels of theory are negligible.

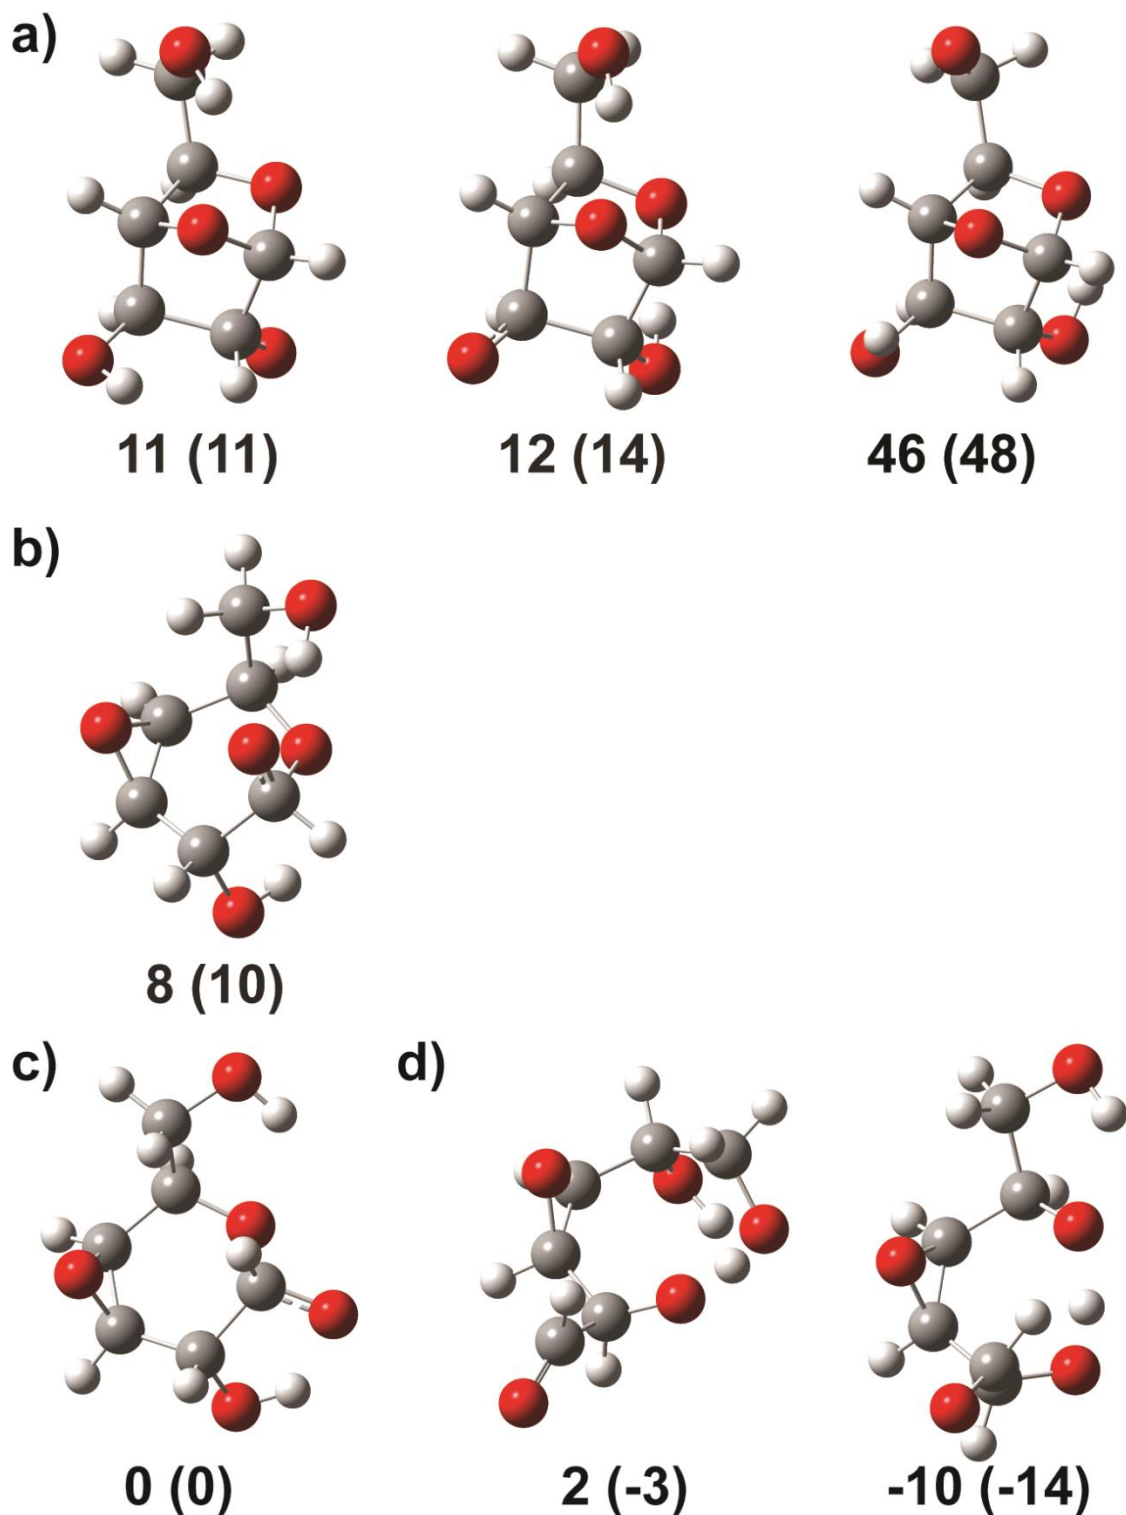

Figure S6: Selected  $Z_I$  anion low-energy conformers calculated at the M06-2X/6-31++G(d,p) level of theory. a) deprotonated 1,4-anhydroglucose structures, [1,4-anhydroglucose- $H$ ] $^-$ ; b) deprotonated 3,4-anhydroglucose, [3,4-anhydro- $\beta$ -glucose- $H$ ] $^-$ ; c) deprotonated 3,4-anhydroglucose [3,4-anhydro- $\alpha$ -glucose- $H$ ] $^-$ ; d) deprotonated, ring-open aldehyde isomers. Values in  $\text{kJ mol}^{-1}$ :  $\Delta E_{\text{el+ZPE,0K}}$  ( $\Delta G_{298}$ ).

| Minima and TSs                               | $E_{\text{el}}/\text{H}$ | $E_{\text{el+ZPE}}/\text{H}$ | $\Delta E_{\text{el+ZPE,0K}}/\text{kJ mol}^{-1}$ | $\Delta H_{298}/\text{kJ mol}^{-1}$ | $\Delta G_{298}/\text{kJ mol}^{-1}$ | $\Delta S_{298}/\text{J mol}^{-1}$ |
|----------------------------------------------|--------------------------|------------------------------|--------------------------------------------------|-------------------------------------|-------------------------------------|------------------------------------|
| GM                                           | -1296.986125             | -1296.624955                 | 0                                                | 0                                   | 0                                   | 0                                  |
| C <sub>1</sub> -Z <sub>1</sub> TS_1          | -1296.909679             | -1296.551085                 | 193.9                                            | 196.5                               | 190.0                               | 21.8                               |
| C <sub>1</sub> -Z <sub>1</sub> TS_2          | -1296.908922             | -1296.550436                 | 195.6                                            | 198.7                               | 190.1                               | 28.8                               |
| <sup>0,2</sup> A <sub>2</sub> formation TS_1 | -1296.949413             | -1296.591725                 | 87.2                                             | 89.5                                | 83.3                                | 20.7                               |
| <sup>0,2</sup> A <sub>2</sub> formation TS_2 | -1296.94447              | -1296.591076                 | 88.9                                             | 92.0                                | 83.5                                | 28.3                               |
| Ring-forming TS ( $\alpha$ )                 | -1296.920038             | -1296.562144                 | 164.9                                            | 161.1                               | 169.1                               | -26.8                              |
| Ring-forming TS ( $\beta$ )                  | -1296.924404             | -1296.566837                 | 152.6                                            | 148.7                               | 157.2                               | -28.2                              |

Table S1: Relative energies of the transition structures of deprotonated lactose ( $\beta$ -D-galactopyranosyl-(1 $\rightarrow$ 4)-D-Glucose ring-open) calculated at the M06-2X/6-31++G(d,p) level of theory. The ring-open GM is 32.1 kJ mol<sup>-1</sup> ( $\Delta E_{\text{el+ZPE,0K}}$ ) above the  $\alpha$ -anomer (Table 1).

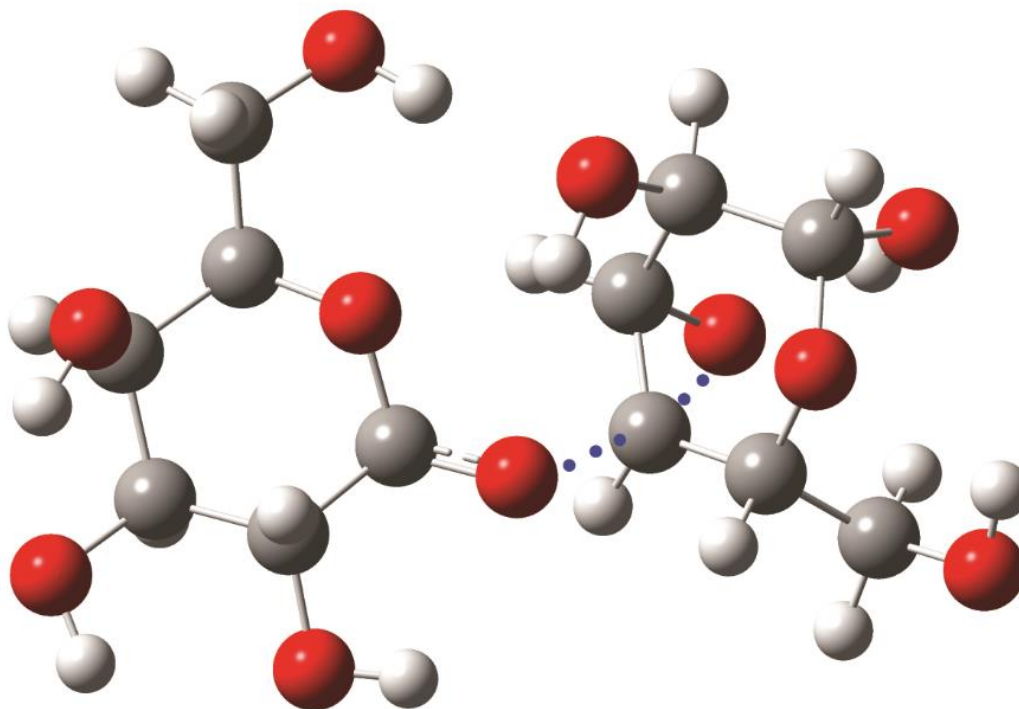

**164 (162)**

Figure S7: The higher-energy 3,4-anhydroglucose-forming  $C_1$ - $Z_I$  transition structures of deprotonated lactose ( $\beta$ -D-galactopyranosyl-(1 $\rightarrow$ 4)- $\beta$ -D-Glucose) calculated at the M06-2X/6-31++G(d,p) level of theory. Values in kJ mol<sup>-1</sup>:  $\Delta E_{\text{el}} + \text{ZPE}_{0\text{K}}$  ( $\Delta G_{298}$ ). The reaction coordinate is illustrated with blue dots.

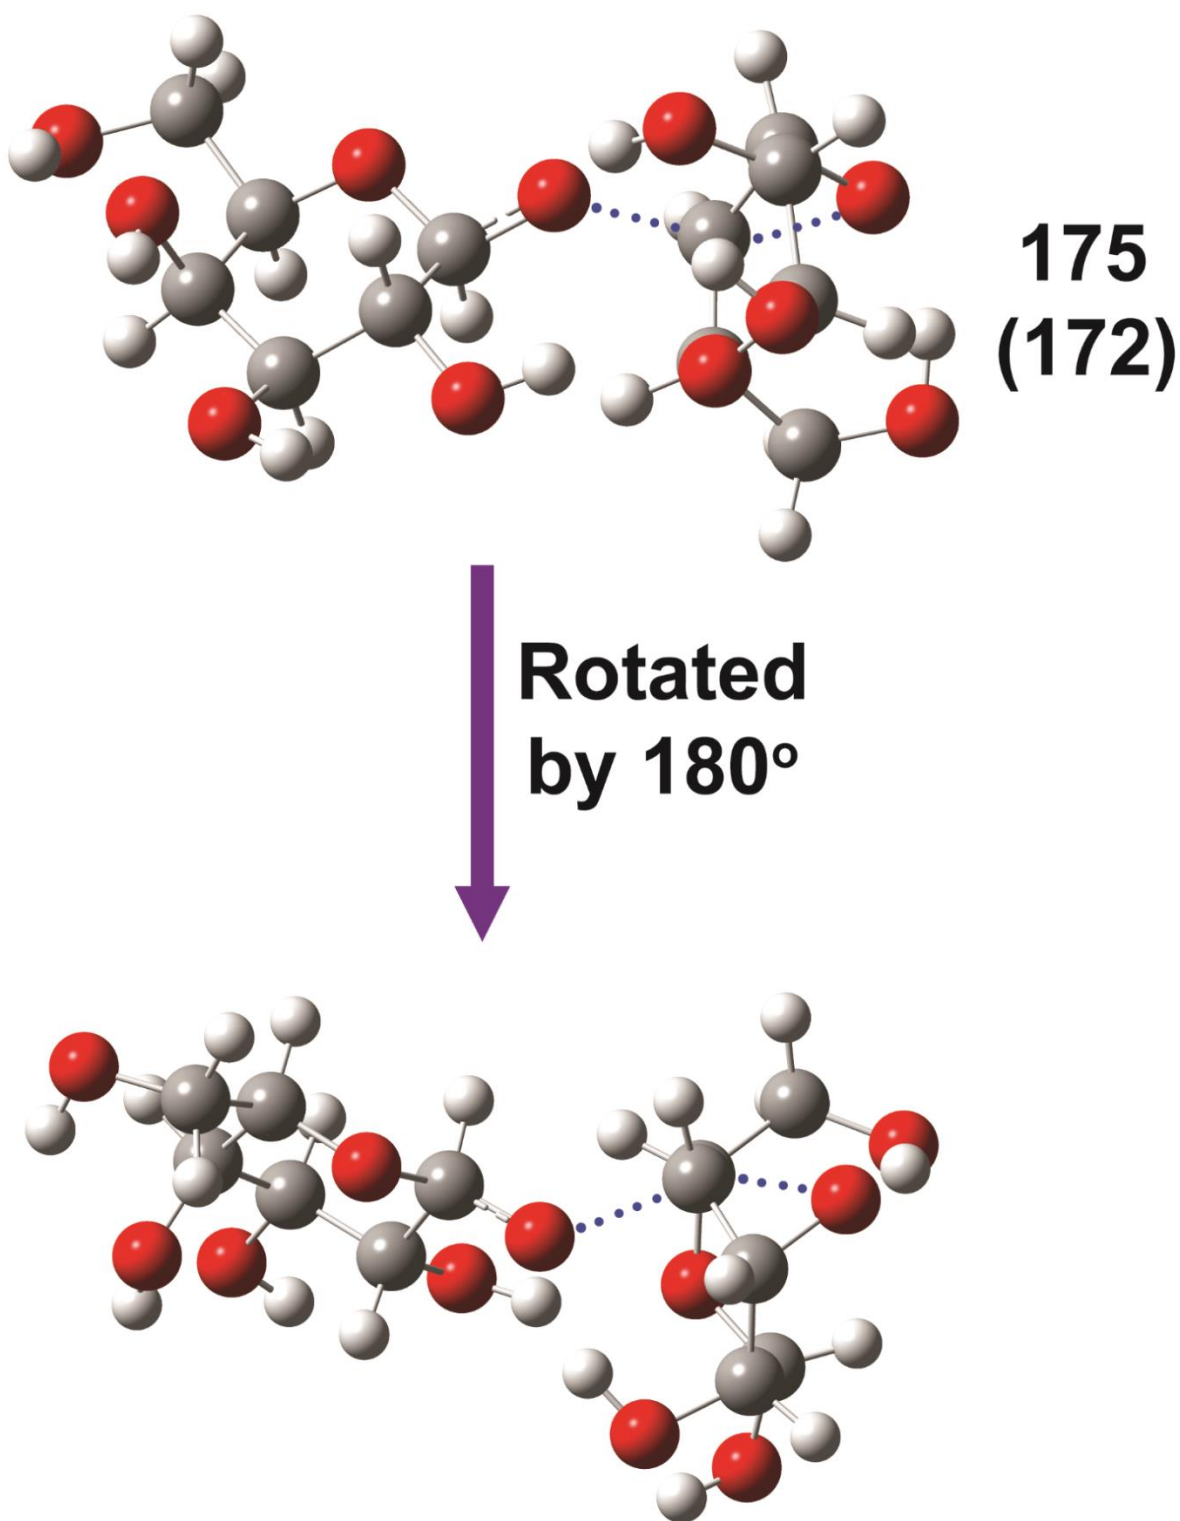

Figure S8: The lowest-energy 3,4-anhydroglucose-forming  $C_1$ - $Z_1$  transition structure of deprotonated lactose ( $\beta$ -D-galactopyranosyl-(1 $\rightarrow$ 4)- $\alpha$ -D-Glucose) calculated at the M06-2X/6-31++G(d,p) level of theory. Values in  $\text{kJ mol}^{-1}$ :  $\Delta E_{\text{el}} + \text{ZPE}_{0\text{K}}$  ( $\Delta G_{298}$ ). The reaction coordinate is illustrated with blue dots.

**a)**

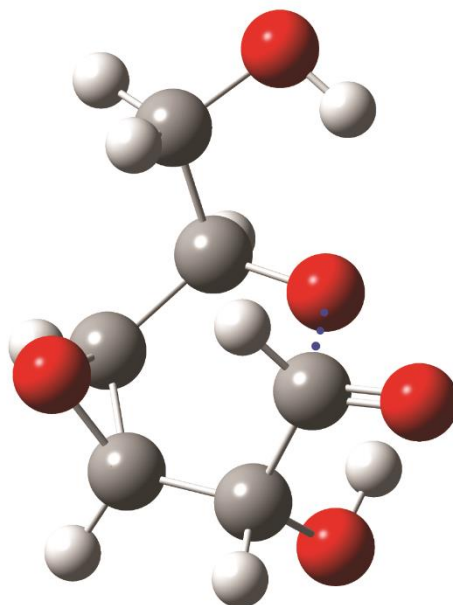

**23 (23)**

**b)**

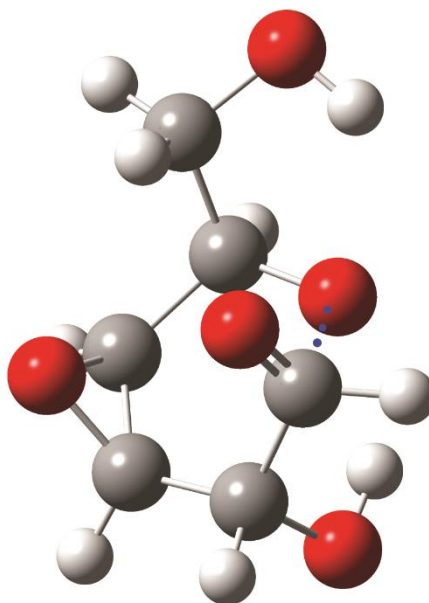

**17 (16)**

Figure S9: The low-energy  $Z_1$ -ring-opening isomerization transition structures generated from of the a) deprotonated 3,4-anhydro- $\alpha$ -glucose anion and b) deprotonated 3,4-anhydro- $\beta$ -glucose anion structures. Relative energies calculated at the M06-2X/6-31++G(d,p) level of theory. Values in  $\text{kJ mol}^{-1}$ :  $\Delta E_{\text{el+ZPE,0K}}$  ( $\Delta G_{298}$ ). The reaction coordinate is illustrated with blue dots.

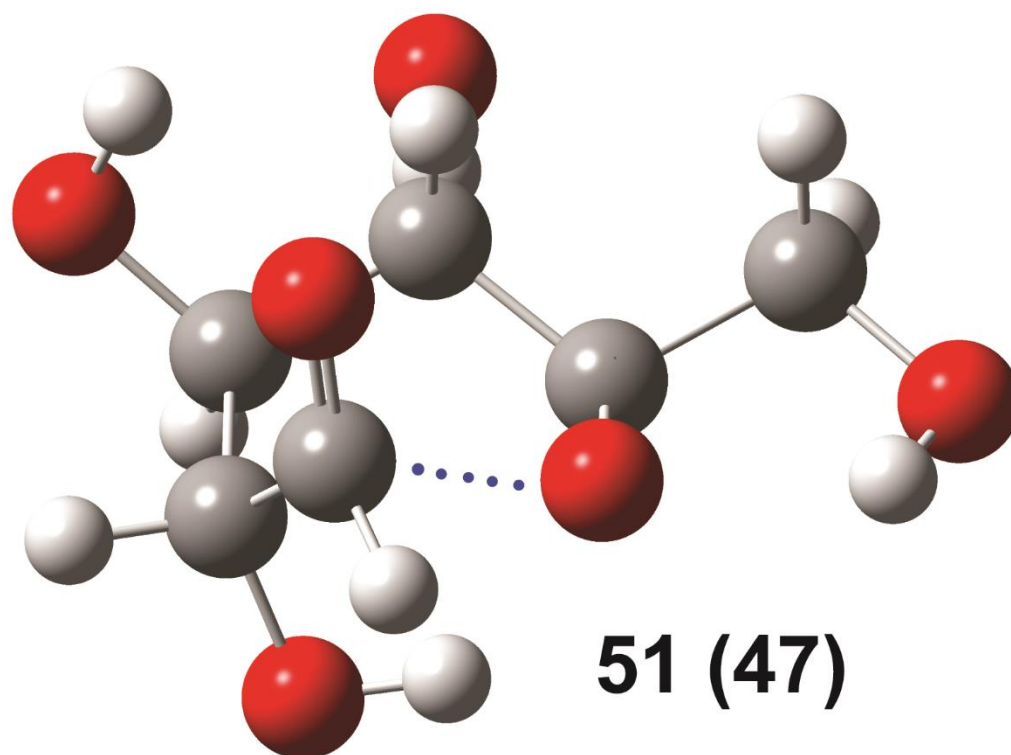

Figure S10: The low-energy  $C_1$ -ring-opening isomerization transition structures generated from the deprotonated  $\beta$ -D-galactopyranose anion structures. Relative energies calculated at the M06-2X/6-31++G(d,p) level of theory. Values in  $\text{kJ mol}^{-1}$ :  $\Delta E_{\text{el+ZPE,0K}}$  ( $\Delta G_{298}$ ). The reaction coordinate is illustrated with blue dots.

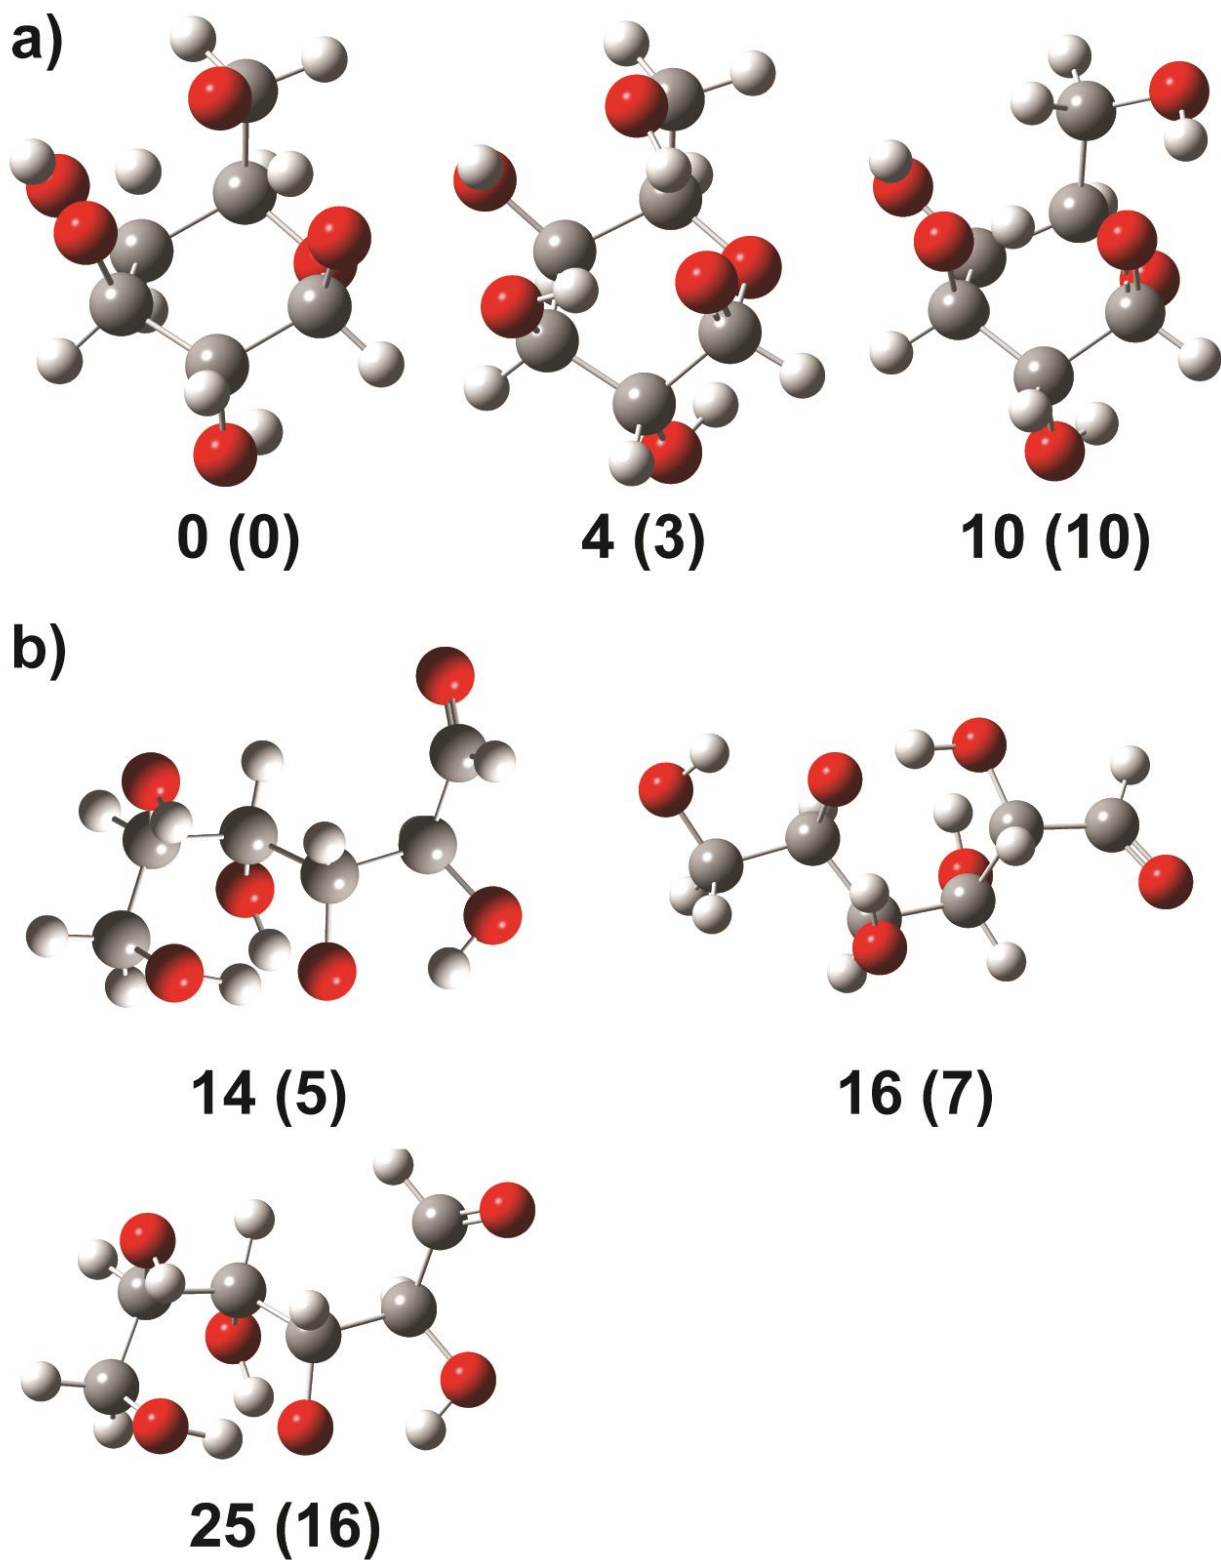

Figure S11: Selected  $C_1$  anion low-energy conformers calculated at the M06-2X/6-31++G(d,p) level of theory. a) deprotonated  $\beta$ -D-galactose  $C_1$  structures,  $[\beta\text{-D-galactose-H}]^-$ ; b) deprotonated, ring-open aldehyde  $C_1$  structures. Values in  $\text{kJ mol}^{-1}$ :  $\Delta E_{\text{el}} + \text{ZPE}_{0\text{K}}$  ( $\Delta G_{298}$ ).

**a)**

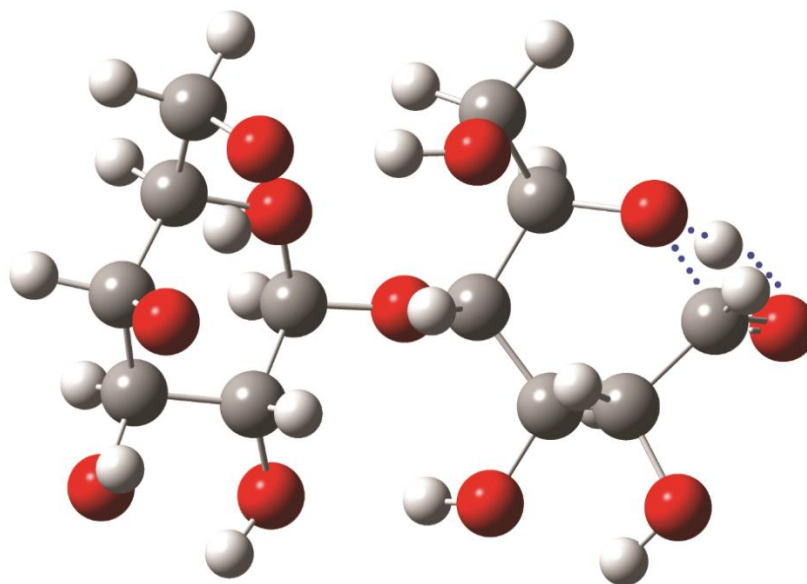

**197 (197)**

**b)**

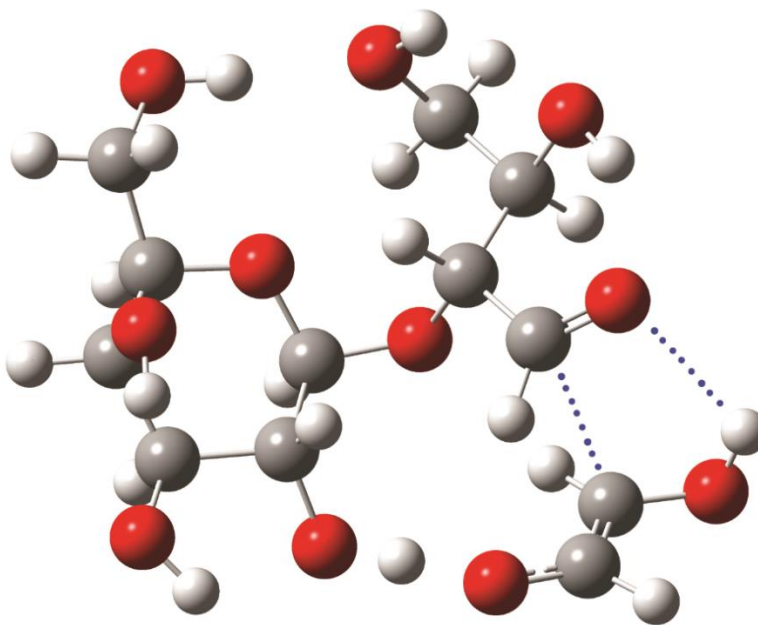

**119 (111)**

Figure S12: The lowest-energy  $^{0,2}A_2$ -forming transition structures of deprotonated lactose ( $\beta$ -D-galactopyranosyl-(1 $\rightarrow$ 4)- $\alpha$ -D-Glucose) calculated at the M06-2X/6-31++G(d,p) level of theory. a) ring-opening TS; b)  $^{0,2}A_2$  formation TS\_A. Values in kJ mol $^{-1}$ :  $\Delta E_{\text{el+ZPE,0K}}$  ( $\Delta G_{298}$ ). The reaction coordinate is illustrated with blue dots.

a)

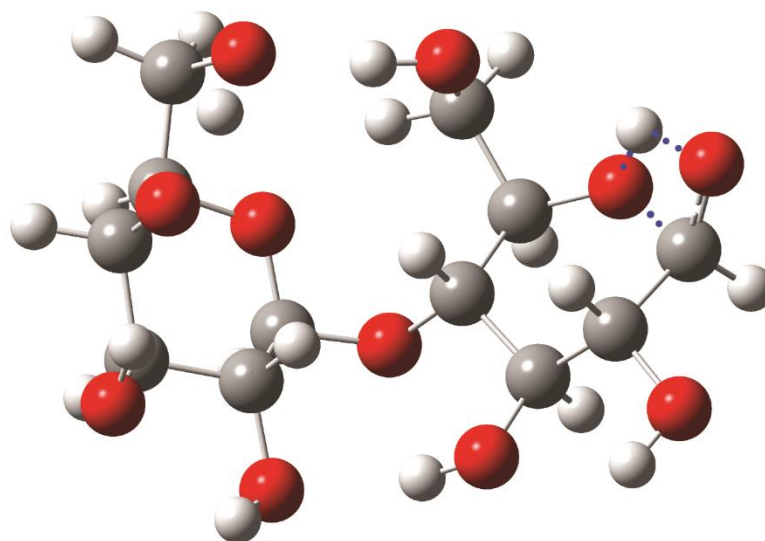

**180 (182)**

b)

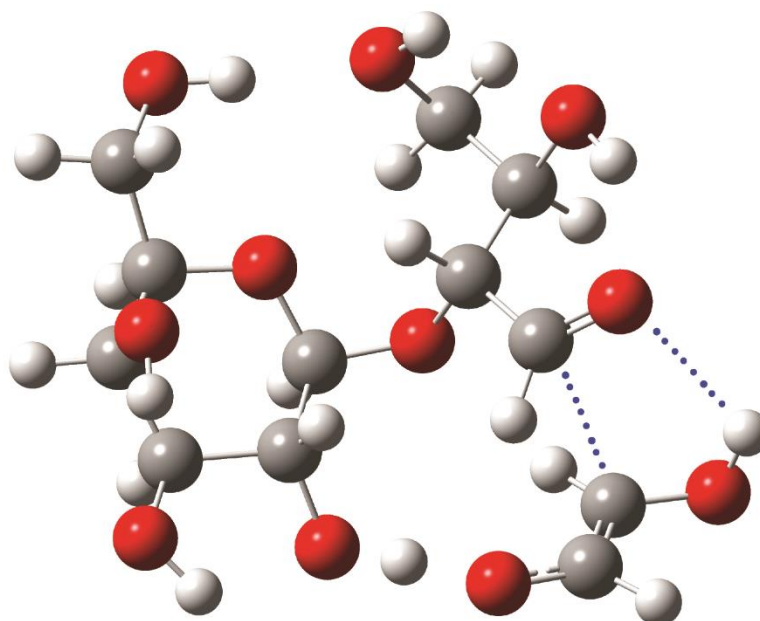

**114 (108)**

Figure S13: The lowest-energy  $^{0,2}A_2$ -forming transition structures of deprotonated lactose ( $\beta$ -D-galactopyranosyl-(1 $\rightarrow$ 4)- $\beta$ -D-Glucose) calculated at the M06-2X/6-31++G(d,p) level of theory. a) ring-opening TS; b)  $^{0,2}A_2$  formation TS\_A. Values in kJ mol $^{-1}$ :  $\Delta E_{\text{el+ZPE,0K}}$  ( $\Delta G_{298}$ ). The reaction coordinate is illustrated with blue dots.
